# Supplementary material
Source: PubMed Central journal article supplement (PMC5874183)
Supplement: NIHMS904344-supplement-Supplementary_Materials.pdf [file NIHMS904344-supplement-Supplementary_Materials.pdf]

**Web-based Supplementary Materials for  
“Experimental Designs for Multi-drug Combination  
Studies Using Signaling Networks”, by Hengzhen  
Huang, Hong-Bin Fang and Ming T. Tan**

**Web Appendix A.**

Let

$$\begin{aligned}\lambda &= [\sigma_f^2 \mathbf{V}_f^e(\phi) + \sigma_\epsilon^2 \mathbf{W}_e]^{-1} \sigma_f^2 \mathbf{r}(\mathbf{x}_0) \text{ and} \\ \lambda_0 &= \mathbf{z}(\mathbf{x}_0)^\top \boldsymbol{\theta} - \lambda^\top \mathbf{Z}_e \boldsymbol{\theta}.\end{aligned}$$

Then  $\hat{Y}_e(\mathbf{x}_0)$  in Eq.(20) can be re-written as

$$\hat{Y}_e(\mathbf{x}_0) = \lambda_0 + \lambda^\top \mathbf{Y}_e.$$

Hence

$$\begin{aligned}\text{MSE} &= E \left[ Y_e(\mathbf{x}_0) - \hat{Y}_e(\mathbf{x}_0) \right]^2 \\ &= E \left[ \mathbf{z}(\mathbf{x}_0)^\top \boldsymbol{\theta} + f(\mathbf{x}_0) - \lambda_0 - \lambda^\top \mathbf{Y}_e \right]^2 \\ &= E \left[ \mathbf{z}(\mathbf{x}_0)^\top \boldsymbol{\theta} + f(\mathbf{x}_0) - \lambda_0 - \lambda^\top \mathbf{Y}_e + \lambda^\top \mathbf{Z}_e \boldsymbol{\theta} - \lambda^\top \mathbf{Z}_e \boldsymbol{\theta} \right]^2 \\ &= E \left[ \mathbf{z}(\mathbf{x}_0)^\top \boldsymbol{\theta} - \lambda_0 - \lambda^\top \mathbf{Z}_e \boldsymbol{\theta} \right]^2 + E \left[ f(\mathbf{x}_0) - \lambda^\top \mathbf{Y}_e + \lambda^\top \mathbf{Z}_e \boldsymbol{\theta} \right]^2 \\ &\quad + 2E \left[ (\mathbf{z}(\mathbf{x}_0)^\top \boldsymbol{\theta} - \lambda_0 - \lambda^\top \mathbf{Z}_e \boldsymbol{\theta})(f(\mathbf{x}_0) - \lambda^\top \mathbf{Y}_e + \lambda^\top \mathbf{Z}_e \boldsymbol{\theta}) \right] \\ &= \left[ \mathbf{z}(\mathbf{x}_0)^\top \boldsymbol{\theta} - \lambda_0 - \lambda^\top \mathbf{Z}_e \boldsymbol{\theta} \right]^2 + E \left[ f(\mathbf{x}_0) - \lambda^\top (\mathbf{Y}_e - \mathbf{Z}_e \boldsymbol{\theta}) \right]^2 \\ &= \left[ \mathbf{z}(\mathbf{x}_0)^\top \boldsymbol{\theta} - \lambda_0 - \lambda^\top \mathbf{Z}_e \boldsymbol{\theta} \right]^2 \\ &\quad + \sigma_f^2 + \lambda^\top [\sigma_f^2 \mathbf{V}_f^e(\phi) + \sigma_\epsilon^2 \mathbf{W}_e] \lambda - 2\lambda^\top \sigma_f^2 \mathbf{r}(\mathbf{x}_0).\end{aligned}$$

By direct substitution the MSE is

$$\begin{aligned}\text{MSE} &= \sigma_f^2 - \sigma_f^2 \mathbf{r}(\mathbf{x}_0)^\top [\sigma_f^2 \mathbf{V}_f^e(\phi) + \sigma_\epsilon^2 \mathbf{W}_e]^{-1} \sigma_f^2 \mathbf{r}(\mathbf{x}_0) \\ &= \sigma_f^2 - \sigma_f^2 \mathbf{r}(\mathbf{x}_0)^\top [\mathbf{V}_f^e(\phi) + (\sigma_\epsilon^2 / \sigma_f^2) \mathbf{W}_e]^{-1} \mathbf{r}(\mathbf{x}_0).\end{aligned}$$

## Web Appendix B.

In the numerical experiment of Fang et al. (2016), 10 single drugs, denoted by  $A_1, \dots, A_{10}$ , were considered and their single drug curves are known as

$$\begin{aligned}y(x_1) &= 10 - 15 \log(x_1), & y(x_2) &= 10 - 15 \log(0.8465x_2), \\y(x_3) &= 10 - 15 \log(0.7165x_3), & y(x_4) &= 10 - 15 \log(0.6065x_4), \\y(x_5) &= 10 - 15 \log(0.5134x_5), & y(x_6) &= 10 - 15 \log(0.4346x_6), \\y(x_7) &= 10 - 15 \log(0.3679x_7), & y(x_8) &= 10 - 15 \log(0.3114x_8), \\y(x_9) &= 10 - 15 \log(0.2636x_9), & y(x_{10}) &= 10 - 15 \log(0.2231x_{10}),\end{aligned}$$

where  $x_1, \dots, x_{10}$  are dose-levels of  $A_1, \dots, A_{10}$ , respectively.

### Web Table 1.

Data generated from single drug curves

| Dose-level | $y(x_1)$ | $y(x_2)$ | $y(x_3)$ | $y(x_4)$ | $y(x_5)$ | $y(x_6)$ | $y(x_7)$ | $y(x_8)$ | $y(x_9)$ | $y(x_{10})$ |
|------------|----------|----------|----------|----------|----------|----------|----------|----------|----------|-------------|
| 0.01       | 79.08    | 81.58    | 84.08    | 86.58    | 89.08    | 91.58    | 94.08    | 96.58    | 99.08    | 99.99       |
| 0.15       | 38.46    | 40.96    | 43.46    | 45.96    | 48.46    | 50.96    | 53.46    | 55.96    | 58.46    | 60.96       |
| 0.29       | 28.57    | 31.07    | 33.57    | 36.07    | 38.57    | 41.07    | 43.57    | 46.07    | 48.57    | 51.07       |
| 0.43       | 22.66    | 25.16    | 27.66    | 30.16    | 32.66    | 35.16    | 37.66    | 40.16    | 42.67    | 45.16       |
| 0.57       | 18.43    | 20.93    | 23.43    | 25.93    | 28.43    | 30.93    | 33.43    | 35.93    | 38.43    | 40.93       |
| 0.71       | 15.14    | 17.64    | 20.14    | 22.64    | 25.14    | 27.64    | 30.14    | 32.64    | 35.14    | 37.64       |
| 0.85       | 12.44    | 14.94    | 17.44    | 19.94    | 22.44    | 24.94    | 27.44    | 29.94    | 32.44    | 34.94       |
| 0.99       | 10.15    | 12.65    | 15.15    | 17.65    | 20.15    | 22.65    | 25.15    | 27.65    | 30.15    | 32.65       |
